# Supplementary material for: Using molecular testing and whole-genome sequencing for tuberculosis diagnosis in a low-burden setting: a cost-effectiveness analysis using transmission-dynamic modelling
Source: HighWire-hosted journal article supplement (doi:10.1136/thoraxjnl-2019-214004), 2021-02-04
Supplement: thoraxjnl-2019-214004supp003_data_supplement.pdf [file thoraxjnl-2019-214004supp003_data_supplement.pdf]

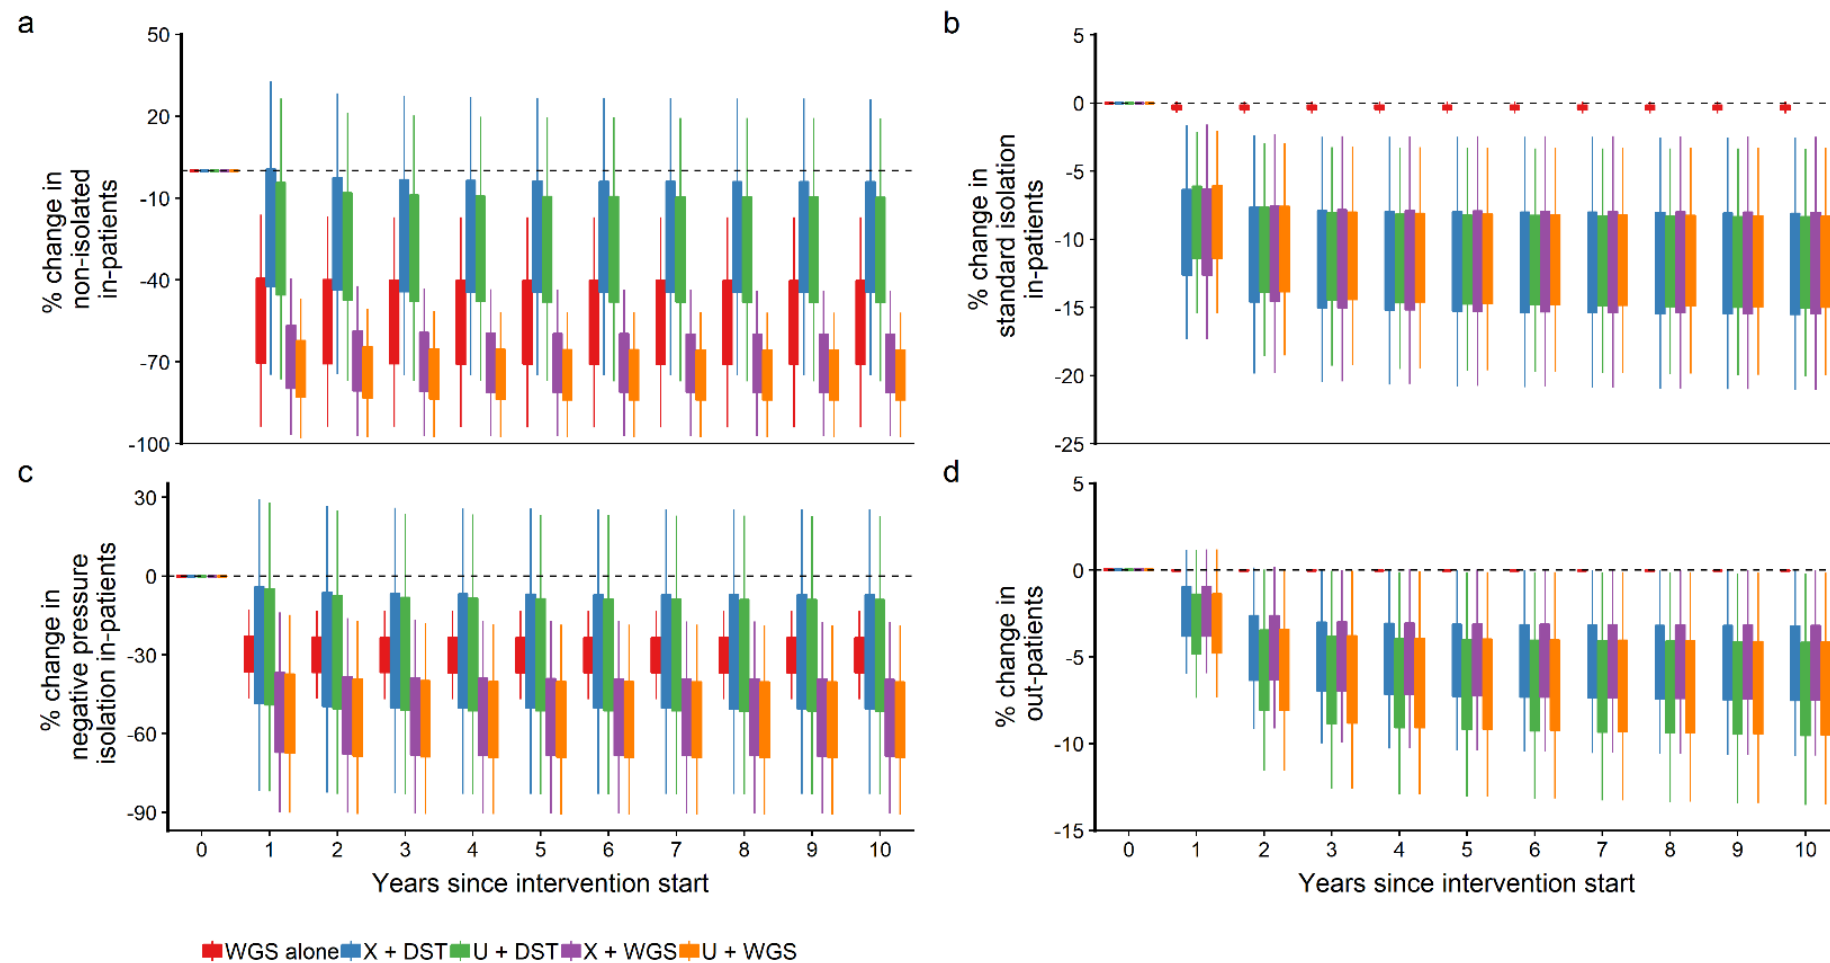

**Supplementary Figure 2: Impact of introducing whole-genome sequencing and/or molecular testing on hospital activity.** Graphs show percentage incremental changes compared with the baseline scenario in numbers of patients (drug-sensitive and multidrug-resistant TB) who are (a) non-isolation inpatients, (b) standard isolation patients, (c) negative-pressure room isolation patients and (d) outpatients during drug treatment after the introduction of changes to the TB-diagnosis pathway. Strategies we consider are standard drug sensitivity testing (DST) being replaced by whole-genome sequencing (WGS: red bars), or molecular testing (X or U) being introduced into the conventional pathway with DST (X + DST: blue bars, U + DST: green bars), or molecular testing being introduced into the conventional pathway with WGS in place of DST (X + WGS: purple bars, U + WGS: orange bars). The boxes show the interquartile ranges, and the whiskers the 95% ranges, of the calculated values.
